# Supplementary material for: Adsorption Ability for Toxic Chromium (VI) Ions in Aqueous Solution of Some Modified Oyster Shell Types
Source: Hindawi journal article supplement (doi:10.1155/2020/2435777), 2020-07-27
Supplement: f1 [file 2435777.f1.docx]

Supplementary file

Table 1S. Position of main peaks in FTIR spectra of OS samples

| Sample | Wavenumber ( cm-1) | | | | | | |
| --- | --- | --- | --- | --- | --- | --- | --- |
| δC-H, γO-H γC-H | C-O | O=C=O, | δO-H | C=O | CH | OH, NH |
| QNOS-PP | 1416 | 1117  874 | - | 1636 | - | - | 3643  3455 |
| QNOS-PP-800 | 1421  711 | 875 | 2512 | 1631 | 1798 | 2985  2873 | 3640  3449 |
| QNOS-PP-800-EDTA | 1419  711 | 875 | 2512 | - | 1797 | 2980  2872 | 3643  3440 |
| PYOS-PP | 1416  713 | 1164  880 | 2518 | 1647 | 1795 | - | 3461 |
| PYOS-PP-Na | 1419  712 | 877 | 2513 | 1690 | 1796 | 2978  2872 | 3447 |
| PYOS-PP-Na-750 | 1421  711 | 874 | 2511 | 1640 | 1799 | 2982  2873 | 3464 |
| PYOS-PP-Na-800 | 1426  711 | 875 | 2512 | 1631 | 1798 | 2980  2875 | 3446 |
| PYOS-PP-Na-900 | 1420  711 | 1126  873 | 2512 | 1644 | 1799 | 2984  2880 | 3643  3462 |
| PYOS-PP-Na-800-EDTA | 1422  711 | 875 | 2512 | 1637 | 1798 | 2977  2872 | 3447 |


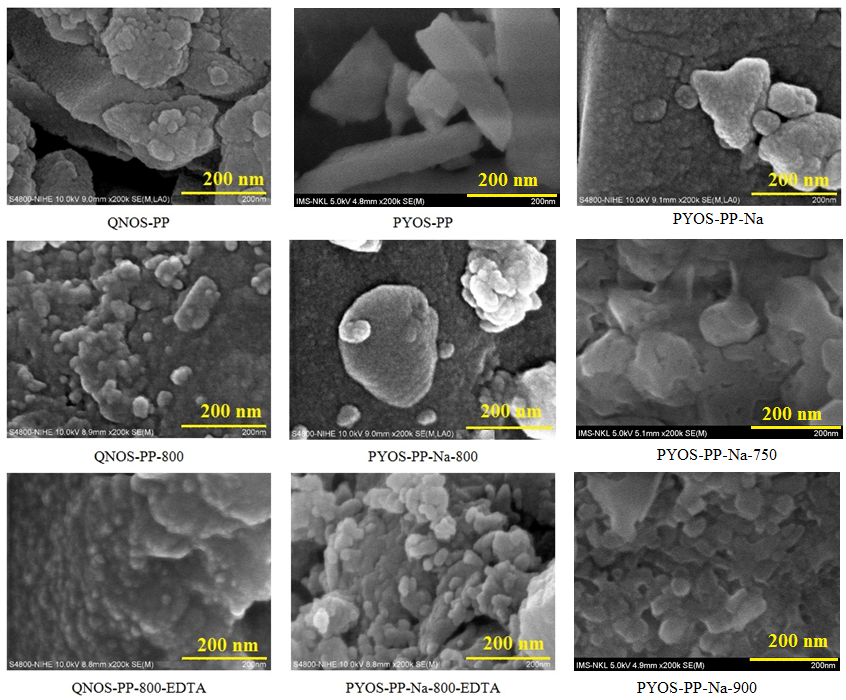


Figure 1S. FESEM images of OS samples at the magnification of 200000 times.
